# Supplementary material for: Adavosertib in Combination with Olaparib in Patients with Refractory Solid Tumors: An Open-Label, Dose-Finding, and Dose-Expansion Phase Ib Trial
Source: PubMed Central journal article supplement — Target Oncol. 2024 Nov 1;19(6):879–92. doi: 10.1007/s11523-024-01102-8 (PMC11557630; doi:10.1007/s11523-024-01102-8), 2024-11-01
Supplement: 11523_2024_1102_MOESM1_ESM.pdf [file 11523_2024_1102_MOESM1_ESM.pdf]

# **Adavosertib in Combination with Olaparib in Patients with Refractory Solid Tumors: An Open-Label, Dose-Finding and Dose-Expansion Phase Ib Trial**

Erika P. Hamilton, MD;<sup>1</sup> Gerald S. Falchook, MD;<sup>2</sup> Judy S. Wang, MD;<sup>1,3</sup> Siqing Fu, PhD, MD;<sup>4</sup> Amit M. Oza, MD, MBBS, FRCPC;<sup>5</sup> Esteban Rodrigo Imedio, MD;<sup>6</sup> Sanjeev Kumar, PhD;<sup>6</sup> Lone Ottesen, MD, PhD;<sup>6</sup> Ganesh M. Mugundu, PhD;<sup>7</sup> Elza C. de Bruin, PhD;<sup>6</sup> Mark J. O'Connor, PhD;<sup>6</sup> Suzanne F. Jones, PharmD;<sup>1</sup> David R. Spigel, MD;<sup>1</sup> Bob T. Li, MD<sup>8</sup>

*<sup>1</sup>Sarah Cannon Research Institute, Nashville, TN, USA; <sup>2</sup>Sarah Cannon Research Institute at HealthONE, Denver, CO, USA; <sup>3</sup>Florida Cancer Specialists, Sarasota, FL, USA; <sup>4</sup>MD Anderson Cancer Center, Houston, TX, USA; <sup>5</sup>Princess Margaret Cancer Centre, University Health Network, University of Toronto, Toronto, Canada; <sup>6</sup>Oncology R&D, AstraZeneca, Cambridge, UK; <sup>7</sup>Clinical Pharmacology and Quantitative Pharmacology, Clinical Pharmacology & Safety Sciences, R&D, AstraZeneca, Boston, MA, USA; <sup>8</sup>Memorial Sloan Kettering Cancer Center, New York, NY, USA*

## **Corresponding author:**

Name: Erika P. Hamilton

Address: Sarah Cannon Research Institute, 250 25th Avenue North, Nashville, TN 37203, USA

Email: Erika.Hamilton@scri.com

**Journal:** *Targeted Oncology*

**Supplementary Table 1: Demographics and baseline characteristics by cohort**

|                                        | Cohort  |         |         |         |         |         |         |         |         |         |         |         |         |         |         |  |
|----------------------------------------|---------|---------|---------|---------|---------|---------|---------|---------|---------|---------|---------|---------|---------|---------|---------|--|
|                                        | 1       | 2       | 3.1     | 3.2     | 4.1     | 4.2     | 4.3     | 5       | 6.1     | 6.2     | 7.1     | 7.2     | 7.3     | 7.4     | 8.1     |  |
|                                        | (n=3)   | (n=3)   | (n=4)   | (n=7)   | (n=7)   | (n=14)  | (n=14)  | (n=5)   | (n=8)   | (n=7)   | (n=16)  | (n=4)   | (n=3)   | (n=13)  | (n=11)  |  |
| <b>Age</b>                             |         |         |         |         |         |         |         |         |         |         |         |         |         |         |         |  |
| Mean, years                            | 66.3    | 57.3    | 53.5    | 59.0    | 58.6    | 56.1    | 54.0    | 60.4    | 59.9    | 60.3    | 61.9    | 53.0    | 58.0    | 60.7    | 62.5    |  |
| (SD)                                   | (8.6)   | (2.1)   | (13.7)  | (10.0)  | (8.5)   | (12.4)  | (11.4)  | (11.1)  | (14.2)  | (6.5)   | (11.4)  | (7.3)   | (9.5)   | (11.6)  | (7.8)   |  |
| Median, years                          | 68      | 58      | 60      | 61      | 58      | 57      | 56      | 63      | 62      | 63      | 64      | 55      | 59      | 62      | 65      |  |
| (range)                                | (57–74) | (55–59) | (33–62) | (44–76) | (50–72) | (26–77) | (33–75) | (41–69) | (38–80) | (51–69) | (36–76) | (44–59) | (48–67) | (29–76) | (50–72) |  |
| ≥65 years, %                           | 66.7    | 0       | 0       | 14.3    | 28.6    | 28.6    | 14.3    | 40.0    | 50.0    | 14.3    | 50.0    | 0       | 33.3    | 38.5    | 54.5    |  |
| <b>Female, %</b>                       | 100     | 66.7    | 50.0    | 85.7    | 100     | 71.4    | 57.1    | 80.0    | 62.5    | 71.4    | 81.3    | 50.0    | 100     | 53.8    | 63.6    |  |
| <b>Race, n (%)</b>                     |         |         |         |         |         |         |         |         |         |         |         |         |         |         |         |  |
| White                                  | 3       | 3       | 4       | 7       | 6       | 10      | 13      | 5       | 6       | 7       | 15      | 3       | 3       | 10      | 10      |  |
| (%)                                    | (100)   | (100)   | (100)   | (100)   | (85.7)  | (71.4)  | (92.9)  | (100)   | (75.0)  | (100)   | (93.8)  | (75.0)  | (100)   | (76.9)  | (90.9)  |  |
| Black/African American                 | 0       | 0       | 0       | 0       | 1       | 2       | 0       | 0       | 0       | 0       | 1       | 0       | 0       | 1       | 1       |  |
| (%)                                    |         |         |         |         | (14.3)  | (14.3)  |         |         |         |         | (6.3)   |         |         | (7.7)   | (9.1)   |  |
| Asian                                  | 0       | 0       | 0       | 0       | 0       | 1       | 1       | 0       | 1       | 0       | 0       | 1       | 0       | 1       | 0       |  |
| (%)                                    |         |         |         |         |         | (7.1)   | (7.1)   |         | (12.5)  |         |         | (25.0)  |         | (7.7)   |         |  |
| Other                                  | 0       | 0       | 0       | 0       | 0       | 1       | 0       | 0       | 1       | 0       | 0       | 0       | 0       | 1       | 0       |  |
| (%)                                    |         |         |         |         |         | (7.1)   |         |         | (12.5)  |         |         |         |         | (7.7)   |         |  |
| <b>Mean BMI, kg/m<sup>2</sup> (SD)</b> | 23.9    | 30.7    | 28.7    | 26.6    | 23.7    | 27.0    | 28.4    | 28.4    | 27.3    | 24.6    | 30.7    | 27.1    | 29.8    | 26.3    | 25.2    |  |
| (SD)                                   | (3.2)   | (10.3)  | (2.5)   | (6.6)   | (1.7)   | (7.8)   | (5.9)   | (6.9)   | (4.4)   | (5.4)   | (10.5)  | (6.9)   | (4.1)   | (4.9)   | (5.2)   |  |
| <b>ECOG PS, n (%)</b>                  |         |         |         |         |         |         |         |         |         |         |         |         |         |         |         |  |
| 0 (normal activity)                    | 0       | 1       | 1       | 1       | 3       | 4       | 5       | 2       | 1       | 3       | 6       | 2       | 2       | 2       | 3       |  |
| (%)                                    |         | (33.3)  | (25.0)  | (14.3)  | (42.9)  | (28.6)  | (35.7)  | (40.0)  | (12.5)  | (42.9)  | (37.5)  | (50.0)  | (66.7)  | (15.4)  | (27.3)  |  |



|                                                   |        |     |        |     |        |        |        |     |        |        |       |        |     |        |        |
|---------------------------------------------------|--------|-----|--------|-----|--------|--------|--------|-----|--------|--------|-------|--------|-----|--------|--------|
| Liver                                             | 0      | 0   | 0      | 0   | 0      | 0      | 1      | 0   | 0      | 0      | 0     | 0      | 0   | 0      | 0      |
|                                                   |        |     |        |     |        |        | (7.1)  |     |        |        |       |        |     |        |        |
| Gallbladder                                       | 0      | 0   | 0      | 0   | 0      | 0      | 0      | 0   | 0      | 1      | 0     | 0      | 0   | 0      | 0      |
|                                                   |        |     |        |     |        |        |        |     |        | (14.3) |       |        |     |        |        |
| Other                                             | 1      | 0   | 1      | 0   | 1      | 2      | 4      | 0   | 1      | 0      | 1     | 1      | 0   | 2      | 4      |
|                                                   | (33.3) |     | (25.0) |     | (14.3) | (14.3) | (28.6) |     | (12.5) |        | (6.3) | (25.0) |     | (15.4) | (36.4) |
| <b>Median number of previous therapy regimens</b> |        |     |        |     |        |        |        |     |        |        |       |        |     |        |        |
| Systemic                                          | 3.0    | 8.0 | 3.5    | 2.0 | 3.0    | 3.0    | 3.0    | 7.0 | 4.5    | 4.0    | 4.0   | 3.5    | 3.0 | 4.0    | 3.0    |
| Radiotherapy                                      | 0      | 0   | 0      | 1.0 | 0      | 1.0    | 1.0    | 1.0 | 1.0    | 1.0    | 1.0   | 1.5    | 0   | 1.0    | 0      |

---

*BMI* body mass index, *ECOG PS*, Eastern Cooperative Oncology Group performance status, *SD* standard deviation

**Supplementary Table 2: Summary of clinical response by cohort (parts A and B)**

| Cohort | Patients, n | Evaluable for ORR, n <sup>a</sup> | ORR, n (%) | Median PFS, months (95% CI) | Evaluable for DCR, n <sup>a</sup> | DCR, <sup>b</sup> n (%) |
|--------|-------------|-----------------------------------|------------|-----------------------------|-----------------------------------|-------------------------|
| 1      | 3           | 3                                 | 0          | 5.6 (2.8–5.6)               | 3                                 | 3 (100)                 |
| 2      | 4           | 3                                 | 1 (33.3)   | 4.4 (1.5–4.4)               | 3                                 | 2 (66.7)                |
| 3.1    | 4           | 3                                 | 0          | 6.0 (0.8–11.1)              | 4                                 | 3 (75.0)                |
| 3.2    | 7           | 7                                 | 1 (14.3)   | 10.9 (1.3–10.9)             | 7                                 | 5 (71.4)                |
| 4.1    | 7           | 7                                 | 1 (14.3)   | 2.6 (0.8–6.4)               | 7                                 | 4 (57.1)                |
| 4.2    | 14          | 13                                | 4 (30.8)   | 7.4 (1.2–15.8)              | 13                                | 10 (76.9)               |
| 4.3    | 14          | 13                                | 1 (7.7)    | 2.7 (1.3–3.5)               | 14                                | 7 (50.0)                |
| 5      | 5           | 4                                 | 2 (50.0)   | 9.8 (4.7–NC)                | 4                                 | 4 (100)                 |
| 6.1    | 7           | 6                                 | 1 (16.7)   | 1.4 (0.6–NC)                | 7                                 | 1 (14.3)                |
| 6.2    | 7           | 7                                 | 0          | 1.3 (0.6–5.5)               | 7                                 | 1 (14.3)                |
| 7.1    | 16          | 15                                | 0          | 4.0 (1.4–10.0)              | 16                                | 10 (62.5)               |
| 7.2    | 4           | 4                                 | 1 (25.0)   | 5.9 (1.2–7.7)               | 4                                 | 3 (75.0)                |
| 7.3    | 3           | 3                                 | 0          | 1.4 (1.1–1.7)               | 3                                 | 0                       |
| 7.4    | 13          | 11                                | 1 (9.1)    | 4.0 (1.4–10.6)              | 13                                | 8 (61.5)                |
| 8.1    | 11          | 9                                 | 3 (33.3)   | 1.4 (1.2–10.0)              | 10                                | 4 (40.0)                |
| SCLC   | 9           | 9                                 | 1 (11.1)   | 1.5 (1.3–4.2)               | 9                                 | 2 (22.2)                |

The highlighted rows indicate the MTD for bid and qd dosing; the RP2D (cohort 7.4, adavosertib 200 mg qd + olaparib 200 mg bid) was carried forward into the dose-expansion part of this study. <sup>a</sup>For ORR and DCR, evaluable patients have measurable disease and received >75% of the planned dose of adavosertib and olaparib; <sup>b</sup>Defined as the proportion of patients achieving CR, PR, or stable disease over the entirety of the study. *bid* twice daily, *CI* confidence interval, *CR* complete response, *DCR* disease control rate, *MTD* maximum tolerated dose, *ORR* objective response rate, *PFS* progression-free survival, *PR* partial response, *qd* once daily, *RP2D* recommended phase II dose

**Supplementary Table 3: Changes in olaparib pharmacokinetics following combination with adavosertib (part A)**

| Cohort | Adavosertib dose<br>(schedule) | Olaparib dose | N  | AUC <sub>0-10h</sub> ratio<br>(95% CI) | C <sub>max</sub> ratio (95% CI) |
|--------|--------------------------------|---------------|----|----------------------------------------|---------------------------------|
| 4.1    | 175 mg bid (3/4)               | 200 mg bid    | 7  | 1.62 (1.33–1.97)                       | 1.29 (1.08–1.56)                |
| 4.2    | 175 mg bid (3/4)               | 200 mg bid    | 13 | 1.15 (0.93–1.43)                       | 1.01 (0.79–1.30)                |
| 4.3    | 175 mg bid (3/4)               | 200 mg bid    | 14 | 1.10 (0.92–1.32)                       | 0.98 (0.86–1.12)                |
| 3.2    | 150 mg bid (3/4)               | 200 mg bid    | 7  | 0.73 (0.47–1.13)                       | 0.83 (0.51–1.35)                |
| 7.4    | 200 mg qd (3/4)                | 200 mg bid    | 13 | 1.10 (0.94–1.28) <sup>a</sup>          | 1.01 (0.87–1.17)                |
| 5      | 175 mg bid (3/4)               | 300 mg bid    | 4  | 1.08 (0.43–2.73)                       | 0.99 (0.54–1.83)                |
| 8.1    | 200 mg qd (3/4)                | 300 mg bid    | 10 | 0.95 (0.76–1.18)                       | 0.79 (0.62–1.00)                |

<sup>a</sup>Data only available for N=12 patients

AUC<sub>0-10h</sub> area under the plasma concentration–time curve from time zero to 10 hours, *bid* twice daily, *CI* confidence interval, C<sub>max</sub> maximum plasma drug concentration, *qd* once daily

## Supplementary Fig. 1 Patient disposition

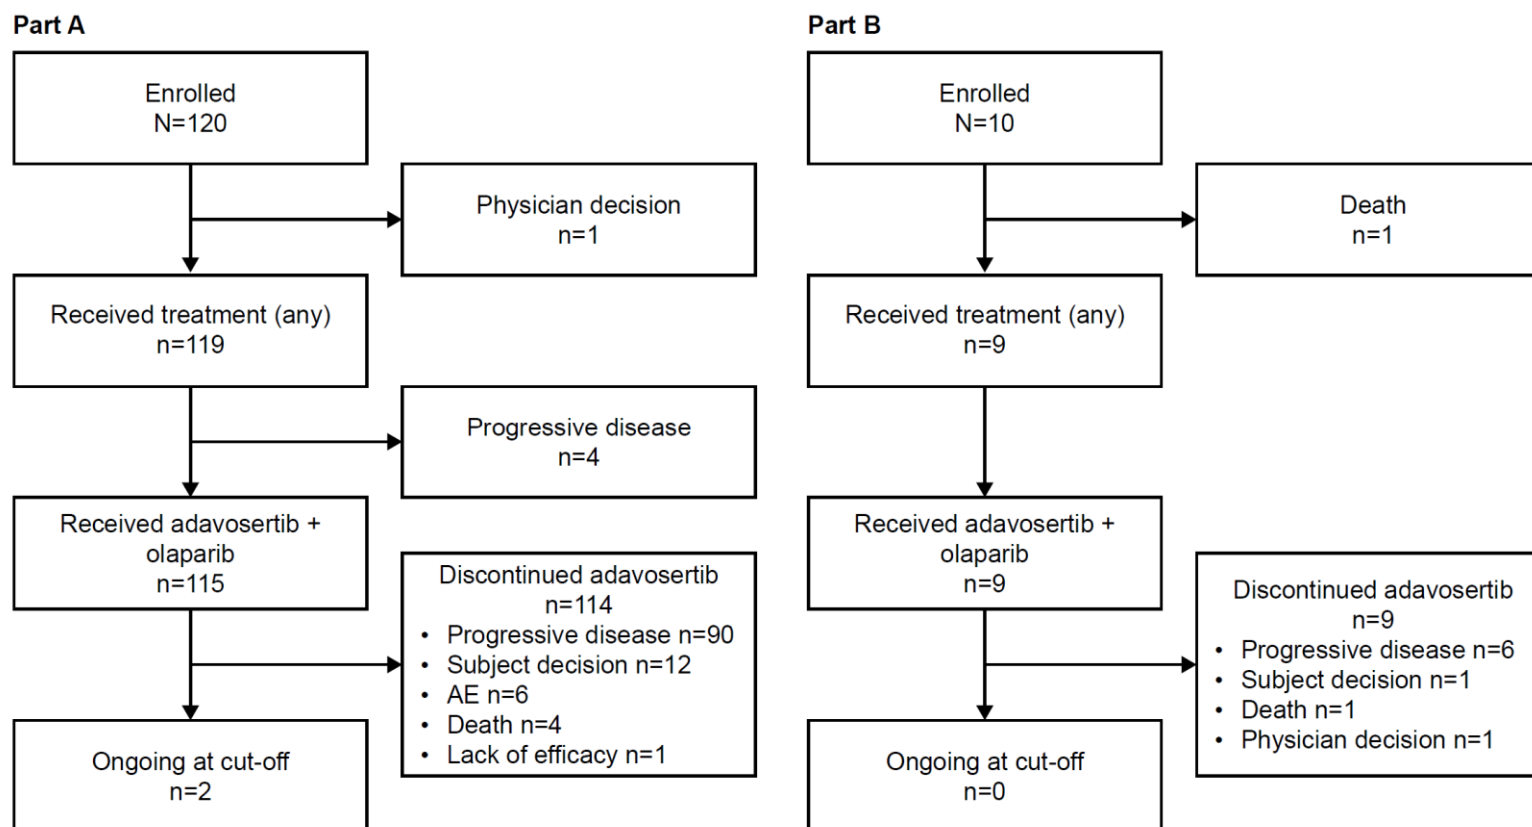

In part A, patients received adavosertib (*qd* or *bid*) for 3 consecutive days with 4 days off treatment (3/4), or for 5 consecutive days with 2 days off treatment (5/2; *qd* cohorts only), plus continuous oral olaparib (*bid*) for 14 or 21 days of a 21-day cycle. In part B (expansion cohort), patients received adavosertib 200 mg *qd* (3 days on, 4 days off treatment) for 2 of 3 weeks, plus olaparib 200 mg *bid*. *AE* adverse event, *bid* twice daily, *qd* once daily

**Supplementary Fig. 2 Comparison of pharmacokinetics across adavosertib doses in combination with olaparib 200 mg bid (part A)**

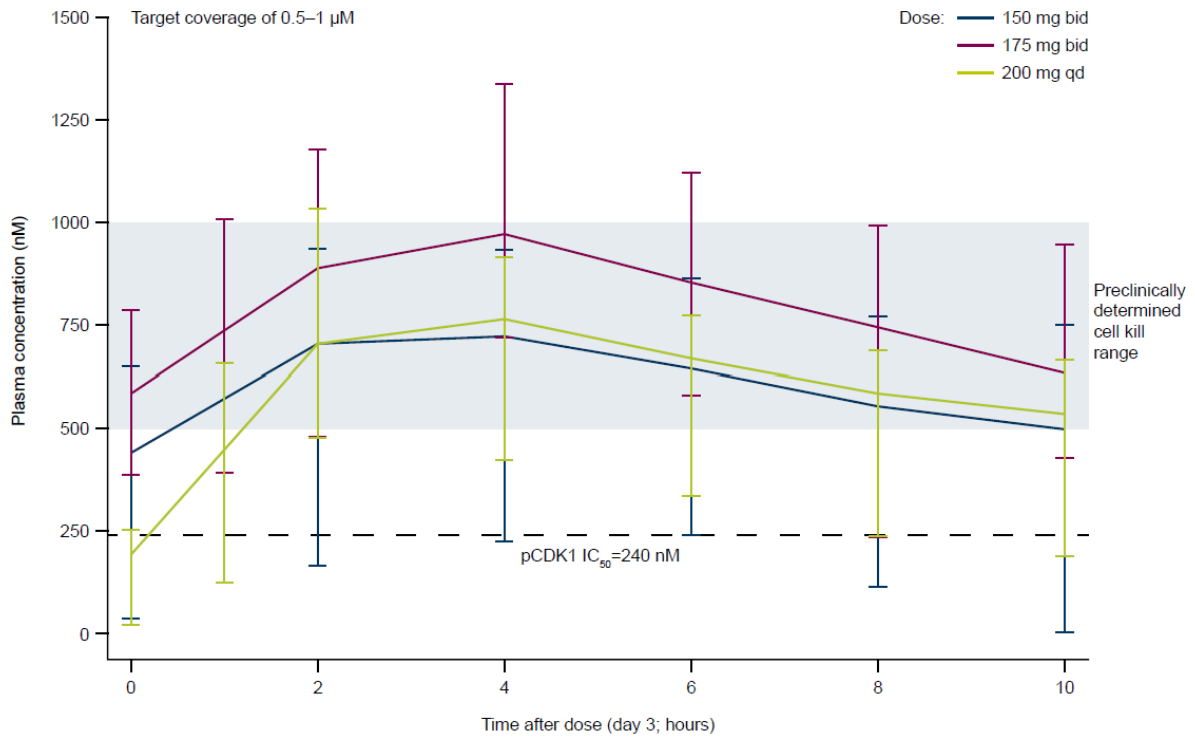

Data are shown as geometric mean  $\pm$  SD. *bid* twice daily, *IC<sub>50</sub>* 50% inhibitory concentration, *pCDK1* phosphorylated CDK1, *qd* once daily



**Supplementary Fig. 3 Olaparib clinical  $C_{min,ss}$  compared with preclinical pharmacodynamics of the protease-activated receptor  $IC_{95}$  (part A)**

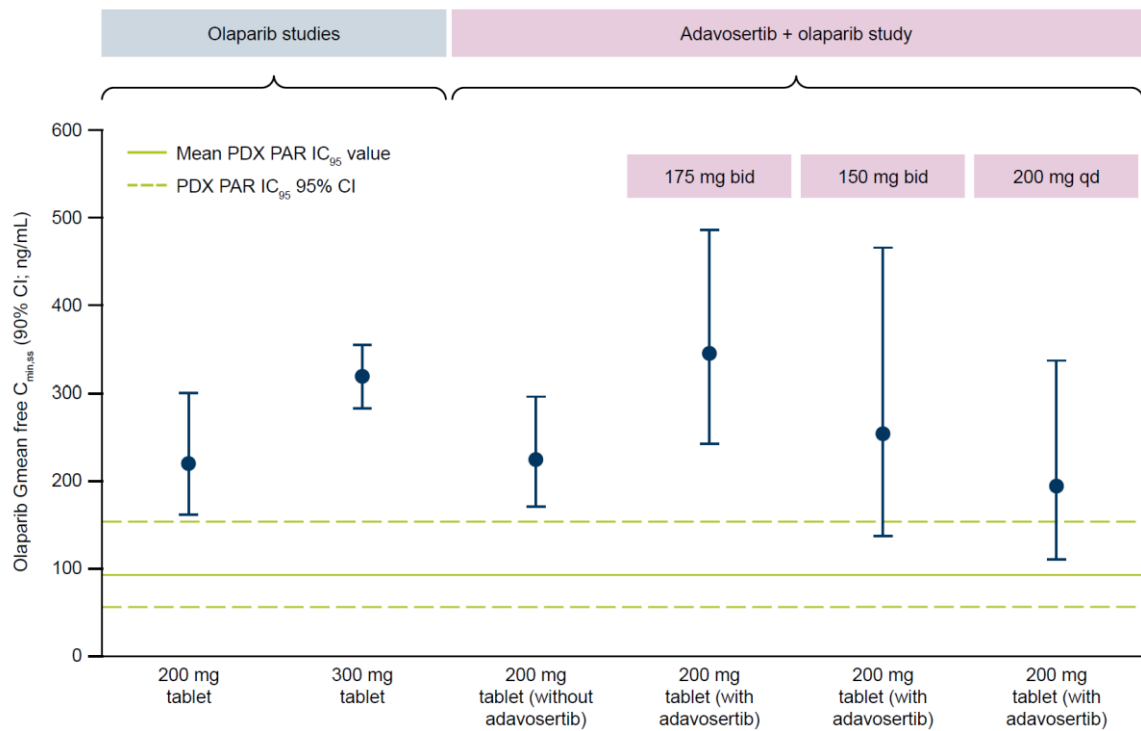

*Bid*, twice daily, *CI* confidence interval,  $C_{min,ss}$  clinical minimum steady-state plasma drug concentration, *PAR* protease-activated receptor, *PDX* pharmacodynamics, *qd* once daily

**Supplementary Fig. 4 Best objective response of patients with available histology for MYC (n=63), cyclinE1 (n=58), and SLFN11 (n=61) expression**

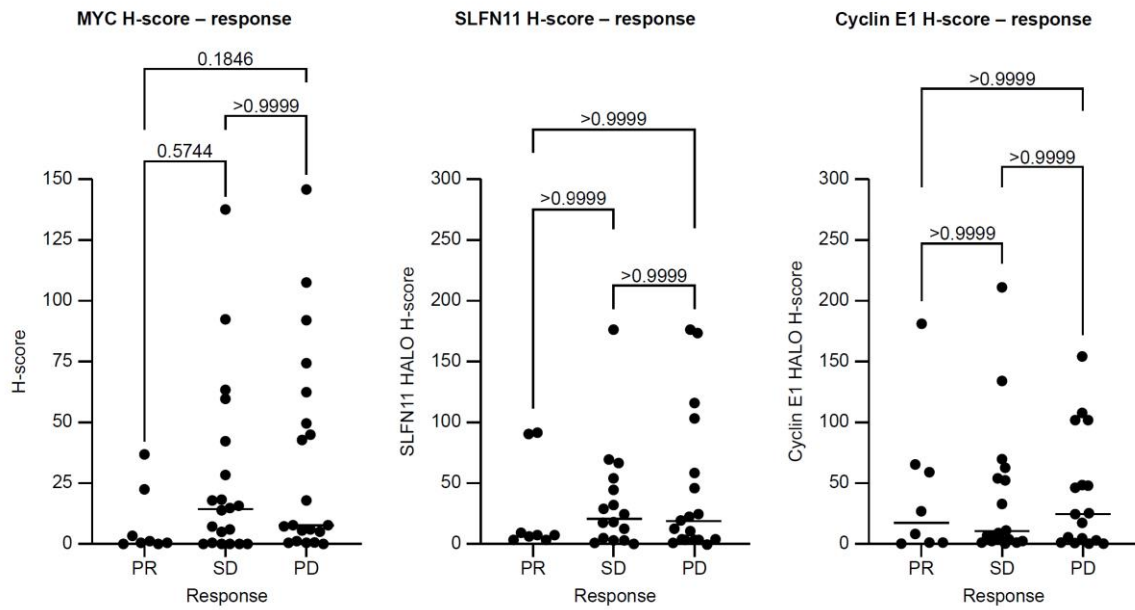

H-score: an ordinal score is assigned to the immunostaining intensity and multiplied by an estimate of the percentage of immunostained tissue for each intensity grade, yielding total scores between 0 and 300. *PD* progressive disease, *PR* partial response, *SD* stable disease
